# Supplementary material
Source: PubMed Central journal article supplement (PMC4333087)
Supplement: MCB.01439-14_zmb999100763so2.pdf [file MCB.01439-14_zmb999100763so2.pdf]

## Supplemental tables

### A) Table enlisting qRT-PCR primers:

| Gene               | Primer sequence                                                              |
|--------------------|------------------------------------------------------------------------------|
| <i>otoferlin b</i> | GCAAAGACGGCAAAGCAGTGC (Forward); GCTTCCACTTTGCCTGTAATTTCTAGCTCATC (Reverse)  |
| <i>otoferlin a</i> | GGACTGTTTACACACAACCTGAACATCAGT (Forward); CCCTCTATGTCATCCTCGTCTGCT (Reverse) |
| <i>beta-actin</i>  | AAGCAGGAGTACGATGAGTC (Forward);<br>TGGAGTCCTCAGATGCATTG (Reverse)            |
| <i>Myosin-6b</i>   | TGGCTCCCATCAGTCAAGTG (Forward)<br>TTCTCGGTGTCATCCAAGCC (Reverse)             |
| <i>VGlut3</i>      | ATGTCTTCGTGATCGCCTCC (Forward)<br>GTTTGGCGCCTGATGAGTTG (Reverse)             |
| <i>shha</i>        | ACCGACACAAGAGCAAATACG (Forward)<br>GTCCTTACGGCCTTCTG (Reverse)               |

### B) Table enlisting ISH primers:

| Gene                   | Primer sequence                                                                                                              |
|------------------------|------------------------------------------------------------------------------------------------------------------------------|
| <i>otoferlin b</i>     | ATGGACTAAAGAAACAGACGGATGAGCATTTAG (Forward); TAATACGACTCACTATAGGG-TCAAACGCTGCAGAGAGAAGCTTCT (Reverse with T7-polymerase tag) |
| <i>otoferlin a</i>     | GGACTGTTTACACACAACCTGAACATCAGT (Forward); TAATACGACTCACTATAGGG-CCCTCTATGTCATCCTCGTCTGCT (Reverse with T7-polymerase tag)     |
| <i>Mouse-otoferlin</i> | TCCCCCAGGAAACCAAGAAGTAC (Forward); TAATACGACTCACTATAGGG-GGGATCAGGTCATTGCGAGCC (Reverse with T7-polymerase tag)               |

## Supplemental tables

**C) Table enlisting primers for full-length and truncated mouse *otoferlin* constructs:**

| Gene                                                 | Primer sequence                                                                                                                                                        |
|------------------------------------------------------|------------------------------------------------------------------------------------------------------------------------------------------------------------------------|
| Mouse<br><i>otoferlin</i><br>full-<br>length<br>(FL) | 5'-GACCGCGGATGCATCATCACCATCACCATGGTATGGCCCTGATTGTTACCTCAAG-3',<br>5'-CAGCGGCCGCTCAGGCCCTTAGGAGCTTC-3'                                                                  |
| <i>otoferlin</i><br>$\Delta$ ABC                     | 5'-GACCGCGGATGCATCATCACCATCACCATGGTTCCTTTCCGCCATCAGCCTAGTC-3',<br>5'-CAGCGGCCGCTCAGGCCCTTAGGAGCTTC-3'                                                                  |
| <i>Otoferlin</i><br>$\Delta$ ABCD                    | 5'-CCG CGG ATG CCA AGC AAT GAC CCC ATC AAT GTG CTG GTC-3'<br>5' GCGGCCGC CTA GGC CCC TAG GAG CTT CTT GAC CAT GTA GCC TGG-3'                                            |
| <i>Otoferlin</i><br>$\Delta$ ABCDE                   | 5'- CGA CCG CGG ATG CAC CAT CAC CAT CAC CAT GGC GCC TCC CCC AGG AAA CCC AAG AAG TAC GAG CTG-3'<br>5'-GAT GCG GCC GCC TAG GCC CCT AGG AGC TTC TTG ACC ATG TAG CCT GG-3' |
| <i>Otoferlin</i><br>$\Delta$ BCDEF                   | 5'- CGA CCG CGG ATG GCC CTG ATT GTT CAC CTC AAG ACT GTC TCA GAG-3'<br>5'- GAT GCG GCC GCC TAC TGG AGG GAT TCA TCT CCC AGG AAG TCT CCA TC-3'                            |

## Supplemental tables

D) Table enlisting the splice-blocking morpholino sequences targeting the *otoferlin a* and *b* gene:

| Gene               | Morpholino oligo sequences written from 5' to 3' and complementary to splice -junction target                                                                                                                                                                                                                                                                                                               |
|--------------------|-------------------------------------------------------------------------------------------------------------------------------------------------------------------------------------------------------------------------------------------------------------------------------------------------------------------------------------------------------------------------------------------------------------|
| <i>otoferlin b</i> | 1) ACATTGTAACAGCACACCCAAGA ( <i>e38i38</i> )<br>2) CATCTGCACACAAGAGCACAGAAGT ( <i>e2i2</i> )<br><br>- Morpholino 1 targets "Ensembl" splice variants: OTOF (1 of 2)-201 ENSDART00000041685, OTOF (1 of 2)-002 ENSDART00000149773, OTOF (1 of 2)-001 ENSDART00000149294<br><br>- Morpholino 2 targets "Ensembl" splice variants: OTOF (1 of 2)-201 ENSDART00000041685, OTOF (1 of 2)-002 ENSDART00000149773. |
| <i>otoferlin a</i> | 1) TTTTATGGTTACCGACCAGGTTGT ( <i>e11i11</i> )<br>2) ATGAGATCATCTTTGGTCACCTCTT ( <i>i6e7</i> )<br><br>- Both morpholinos (1 and 2) target "Ensembl" splice variants: otof-001 ENSDART00000136255, otof-201 ENSDART0000008840.                                                                                                                                                                                |

E) Table enlisting gene-specific primers for validating morpholino knockdown:

| Gene               | Primer sequence                                                                                                                                                                                      |
|--------------------|------------------------------------------------------------------------------------------------------------------------------------------------------------------------------------------------------|
| <i>otoferlin b</i> | <i>e38i38</i> - CTCACCGAGGAAGCCAAAGA (Forward); TTGGTTGCAGACGAGATGGC (Reverse)<br><br><i>e2i2</i> - TTTACATACGCAGAGGATACGTCA (Forward); TTGTAGTAAGGGCAGTTGGTCG (Reverse)                             |
| <i>otoferlin a</i> | <i>i6e7</i> - GGATCGAAAAGCCATGCGTC (Forward);<br><br>TAATACGACTCACTATAGGGTCTCCTTTTCCCACGACTGC (Reverse)<br><br><i>e11i11</i> - CTGGAACTTCACCTGGACGA (Forward);<br><br>AACATGACGTCTGGAGGCAC (Reverse) |
